# Genetic structure correlates with ethnolinguistic diversity in eastern and southern Africa

Elizabeth G. Atkinson<sup>1,2\*</sup>, Shareefa Dalvie<sup>3,4,+</sup>, Yakov Pichkar<sup>5,+</sup>, Allan Kalungi<sup>6,7,+</sup>, Lerato Majara<sup>8,9+</sup>, Anne Stevenson<sup>2,10</sup>, Tamrat Abebe<sup>11</sup>, Dickens Akena<sup>6</sup>, Melkam Alemayehu<sup>12</sup>, Fred K. Ashaba<sup>13</sup>, Lukoye Atwoli<sup>14,15</sup>, Mark Baker<sup>2</sup>, Lori B. Chibnik<sup>2,16</sup>, Nicole Creanza<sup>5</sup>, Mark J. Daly<sup>1,2</sup>, Abebaw Fekadu<sup>12,17</sup>, Bizu Gelaye<sup>10,2</sup>, Stella Gichuru<sup>14</sup>, Wilfred E. Injera<sup>18</sup>, Roxanne James<sup>9</sup>, Symon M. Kariuki<sup>19,20</sup>, Gabriel Kigen<sup>21</sup>, Nastassja Koen<sup>3,4</sup>, Karestan C. Koenen<sup>2,10</sup>, Zan Koenig<sup>2</sup>, Edith Kwobah<sup>14</sup>, Joseph Kyebuzibwa<sup>6</sup>, Henry Musinguzi<sup>13</sup>, Rehema M. Mwema<sup>19</sup>, Benjamin M. Neale<sup>1,2</sup>, Carter P. Newman<sup>2,10</sup>, Charles R.J.C. Newton<sup>19,20</sup>, Linnet Ongeri<sup>19</sup>, Sohini Ramachandran<sup>22</sup>, Raj Ramesar<sup>23</sup>, Welelta Shiferaw<sup>12</sup>, Dan J. Stein<sup>3,4</sup>, Rocky E. Stroud<sup>2,10</sup>, Solomon Teferra<sup>12</sup>, Zukiswa Zingela<sup>24</sup>,  
Alicia R. Martin<sup>1,2</sup>, NeuroGAP-Psychosis Study Team

## Affiliations

- 1 Analytic and Translational Genetics Unit and Center for Genomic Medicine, Massachusetts General Hospital, Boston, MA, USA
- 2 Stanley Center for Psychiatric Research, Broad Institute of MIT and Harvard, Cambridge, MA, USA
- 3 Department of Psychiatry and Mental Health, University of Cape Town, Cape Town, South Africa
- 4 South African Medical Research Council (SAMRC) Unit on Risk and Resilience in Mental Disorders, Neuroscience Institute, University of Cape Town, Cape Town, South Africa
- 5 Department of Biological Sciences, Vanderbilt University, Nashville, TN
- 6 Department of Psychiatry, School of Medicine, College of Health Sciences, Makerere University, Kampala, Uganda
- 7 Mental Health Section of MRC/UVRI & LSHTM Uganda Research Unit, Entebbe, Uganda
- 8 South African Medical Research Council (SAMRC) Human Genetics Research Unit, Division of Human Genetics, Institute of Infectious Disease and Molecular Medicine, University of Cape Town, Cape Town, South Africa
- 9 Department of Psychiatry and Mental Health, University of Cape Town, Cape Town, South Africa
- 10 Department of Epidemiology, Harvard T. H. Chan School of Public Health, Boston, MA, USA

- 28 11 Department of Microbiology, Immunology, and Parasitology, School of Medicine, College of Health  
29 Sciences, Addis Ababa University, Addis Ababa, Ethiopia
- 30 12 Department of Psychiatry, School of Medicine, College of Health Sciences, Addis Ababa University,  
31 Addis Ababa, Ethiopia
- 32 13 Department of Immunology & Molecular Biology, College of Health Sciences, Makerere University,  
33 Kampala, Uganda
- 34 14 Department of Mental Health, School of Medicine, Moi University College of Health Sciences, Eldoret,  
35 Kenya
- 36 15 Brain and Mind Institute and Department of Internal Medicine, Medical College East Africa, the Aga  
37 Khan University, Nairobi, Kenya
- 38 16 Department of Neurology, Massachusetts General Hospital, Boston, MA, USA
- 39 17 Centre for Innovative Drug Development & Therapeutic Trials for Africa, Addis Ababa University, Addis  
40 Ababa, Ethiopia
- 41 18 Department of Immunology, School of Medicine, Moi University College of Health Sciences, Eldoret,  
42 Kenya
- 43 19 Neurosciences Unit, Clinical Department, KEMRI-Wellcome Trust Research Programme-Coast, Kilifi,  
44 Kenya
- 45 20 Department of Psychiatry, University of Oxford, Oxford, UK
- 46 21 Department of Pharmacology and Toxicology, School of Medicine, Moi University College of Health  
47 Sciences, Eldoret, Kenya
- 48 22 Department of Ecology and Evolutionary Biology and Center for Computational Molecular Biology,  
49 Brown University, Providence, RI
- 50 23 South African Medical Research Council (SAMRC) Unit on Risk and Resilience in Mental Disorders,  
51 University of Cape Town and Neuroscience Institute, Cape Town, South Africa
- 52 24 Department of Psychiatry and Human Behavioral Sciences, Walter Sisulu University, Mthatha, South  
53 Africa  
54  
55

## 56 **Author list footnotes**

57 †These authors contributed equally to this work.

58 \*Correspondence/lead contact: [eatkinso@broadinstitute.org](mailto:eatkinso@broadinstitute.org)

59

## 60 **Corresponding author contact information**

61 Elizabeth Atkinson, PhD

62 Email: [eatkinso@broadinstitute.org](mailto:eatkinso@broadinstitute.org)

63 Phone: (202) 246-0666

64

65

## 66 **Summary**

67 African populations are the most diverse in the world yet are sorely underrepresented in medical genetics  
68 research. Here, we examine the structure of African populations using genetic and comprehensive  
69 multigenerational ethnolinguistic data from the Neuropsychiatric Genetics of African Populations-Psychosis  
70 study (NeuroGAP-Psychosis) consisting of 900 individuals from Ethiopia, Kenya, South Africa, and Uganda.  
71 We find that self-reported language classifications meaningfully tag underlying genetic variation that would be  
72 missed with consideration of geography alone, highlighting the importance of culture in shaping genetic  
73 diversity. Leveraging our uniquely rich multi-generational ethnolinguistic metadata, we track language  
74 transmission through the pedigree, observing the disappearance of several languages in our cohort as well as  
75 notable shifts in frequency over three generations. We further find significantly higher language transmission  
76 rates for matrilineal groups as compared to patrilineal. We highlight both the diversity of variation within the  
77 African continent, as well as how within-Africa variation can be informative for broader variant interpretation;  
78 many variants appearing rare elsewhere are common in parts of Africa. The work presented here improves the  
79 understanding of the spectrum of genetic variation in African populations and highlights the enormous and  
80 complex genetic and ethnolinguistic diversity within Africa.

81

## 82 **Keywords**

83 Diverse populations; genotype; population genetics; linguistics; population structure

84

## 85 **Introduction**

86 Humans originated in Africa, resulting in more genetic variation on the African continent than anywhere else in  
87 the world; the average African genome has nearly a million more genetic variants than the average non-African  
88 person<sup>1</sup>. Africa is also immensely culturally and ethno-linguistically diverse; while the rest of the world  
89 averages 3.2 to 4.7 ethnic groups per country, African countries have an average of greater than 8 each and  
90 account in total for 43% of the world's ethnic groups<sup>2</sup>. Despite this diversity, African ancestry individuals are  
91 sorely underrepresented in genomic studies, making up only about 2% of GWAS participants<sup>3,4</sup>. Furthermore,  
92 the vast majority of African ancestry populations currently represented in genetic studies are African Americans  
93 or Afro-Caribbeans (72-93% in the GWAS catalog and  $\geq 90\%$  in gnomAD) with primarily West African ancestral  
94 origins<sup>5</sup>. These resources thus currently leave out the substantial diversity from regions of Africa that are  
95 disproportionately informative for human genetics.

96

97 Populations underrepresented in genetic studies contribute disproportionately to our understanding of  
98 biomedical phenotypes relative to European ancestry populations. Despite their paltry representation in  
99 GWAS, African ancestry populations contribute 7% of genome-wide significant associations<sup>5,6</sup>. African  
100 population genetic studies are especially informative given their unique evolutionary history, high level of  
101 genetic variation, and rapid linkage disequilibrium decay<sup>7</sup>. This Eurocentric bias in current genomics studies  
102 and resources also makes African descent individuals less likely to benefit from key genomic findings that do  
103 not translate fully across populations, contributing to health disparities<sup>8</sup>. In this study, we better characterize  
104 the immense genetic and ethnolinguistic diversity in four countries in eastern and southern Africa, offering  
105 insights into population history and structure in diverse African populations. Data are from 900 genotype  
106 samples that are part of the Neuropsychiatric Genetics of African Populations-Psychosis study (NeuroGAP-  
107 Psychosis), a major research and capacity building initiative in Ethiopia, Kenya, South Africa, and Uganda<sup>9,10</sup>

108

109 Genetic variation in Africa has been previously described as following not only isolation-by-distance  
110 expectations, but as being influenced by multiple interconnected ecological, historical, environmental, cultural,  
111 and linguistic factors<sup>11-16</sup>. These factors capture distinct variation from that tagged by genetics and can be  
112 informative for understanding population substructure. Better characterization of the ethnolinguistic  
113 composition of these samples is a key initial step towards running well-calibrated statistical genomics analyses  
114 including association studies. If ethnolinguistic variation tags additional structure than that captured by  
115 geography, explicit incorporation of relevant cultural information into such analyses tests may be the optimal  
116 strategy. In this study, we explore the genetics of Africa and how peoples' cultural affiliations and languages  
117 are related to genetic variation on the continent. We also explore ongoing cultural changes and consider the  
118 impact they will have on the genetics of Africa.

119

## 120 **Results**

### 121 *Genetic Population Structure and Admixture*

122 We compared the ancestral composition of our samples relative to global reference data from the 1000  
123 Genomes Project and the African Genome Variation Project (AGVP) to see the full breadth of genetic diversity.  
124 Most NeuroGAP-Psychosis samples appear genetically similar to their geographically closest reference  
125 samples when compared to global datasets (**Figure 1**). However, large amounts of admixture is visible for  
126 some individuals, particularly among South African individuals (*Supplemental Information*). In South Africa,  
127 some individuals cluster wholly within the European reference cluster; this is expected based on the  
128 demographic composition of Cape Town, where these samples were collected, which is home to a substantial  
129 fraction of people of Dutch ancestry (Afrikaners) and individuals of mixed ancestry<sup>12,15,17-19</sup>.

130

131 We additionally investigated the degree of admixture within samples and how genetic groups cluster in the  
132 data. We ran ADMIXTURE analyses, which partition genetic variation into a given number of distinct genetic  
133 clusters. This helps to visualize the groups that are most genetically distinct from one another, as each  
134 additional component can be thought of as representing the next most differentiated ancestry component in the

135 data, akin to principal components analysis (PCA). We identified the best fit  $k$  value, using five-fold cross  
136 validation, to be 9 using a tailored global reference.

137

138 Examining the ancestry composition at the best fit  $k$ , we identify several ancestry components unique to areas  
139 within continental Africa (**Figure 1C**). Notably, several such components, including those unique to Ethiopia  
140 (purple), West Africa (orange), and South Africa (yellow) appear at earlier values of  $k$  than that separating  
141 South Asians from East Asians and Europeans (brown). While sample sizes affect the ordering of components  
142 identified in ADMIXTURE analyses, this suggests a high level of genetic differentiation between areas of the  
143 African continent rivaling that between those out-of-Africa continental ancestries, as has been previously  
144 demonstrated. We also note that Ethiopian participants have evidence of Eurasian admixture, possibly related  
145 to back-migration into the African continent<sup>17,20–22</sup>.

146

147 **Figure 1.** Genetic and admixture composition of the NeuroGAP-Psychosis samples against a global reference.  
148 A) Map showing the geographic location of African populations included, color coded by the ancestry  
149 components found to be unique to that region. B) First 2 principal components showing NeuroGAP-Psychosis  
150 samples as projected onto global variation of the full 1000 Genomes and AGVP. While most samples fall on a  
151 cline, some South African samples exhibit high amounts of admixture and European genetic ancestry. C)  
152 ADMIXTURE analysis for  $k=2$  through 9 of all African reference and cohort samples as well as three  
153 representative non-African populations from the 1000 Genomes Project. GIH are the Gujarati Indian from  
154 Houston, Texas, CHB are the Han Chinese in Beijing, China, and the GBR are British in England and  
155 Scotland, which were included to capture South Asian, East Asian, and European admixture, respectively.  
156 Individuals are represented as bar charts sorted by population, and ancestry components for each person are  
157 visualized with different colors. The best supported  $k$  value with cross-validation was  $k=9$ .

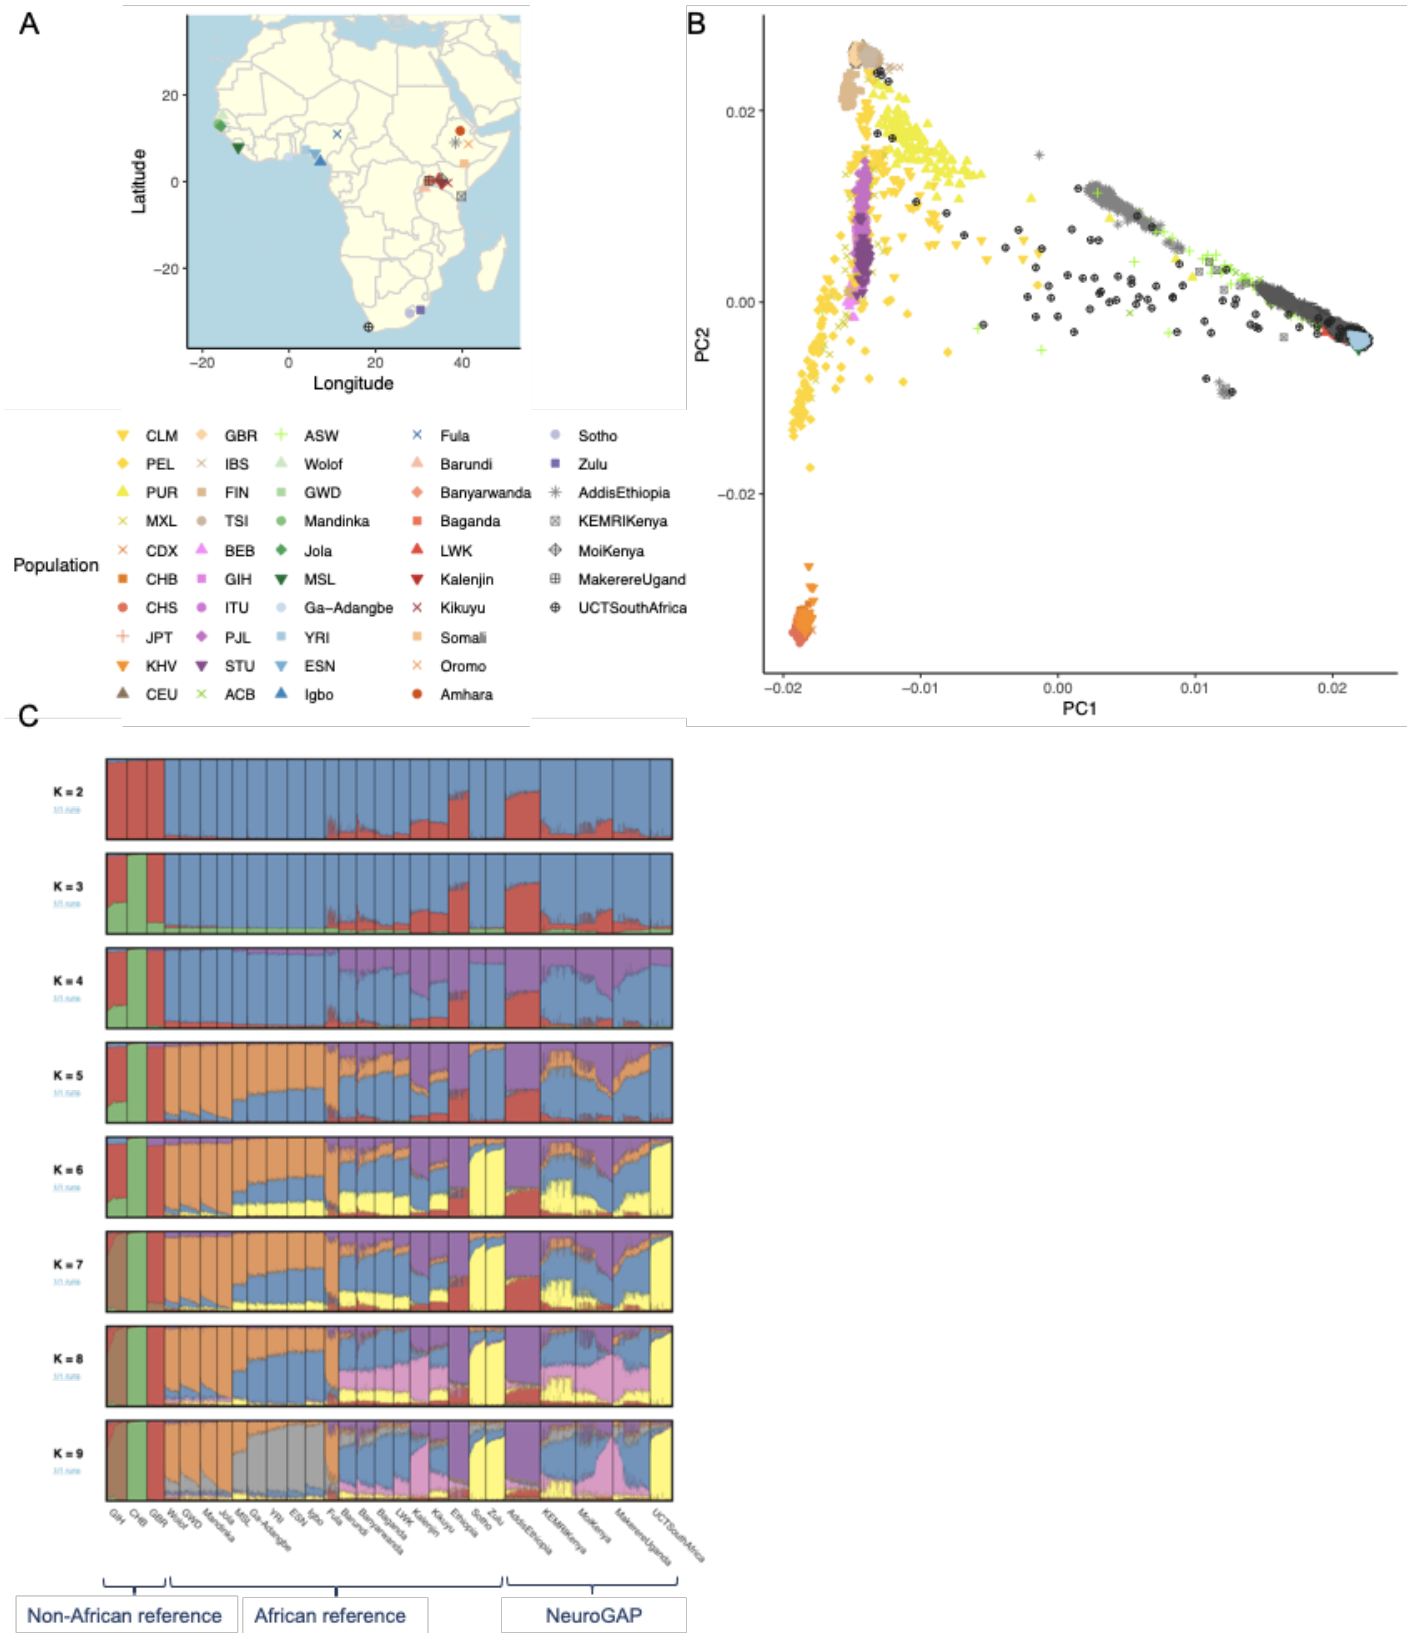

158

159

160 Projecting our samples onto PC space generated from only African reference samples, the top two principal  
161 components (PCs) separate geography, and more specifically East-West and North-South patterns of variation  
162 within Africa (**Figure 2**), mirroring our expectation of isolation by geographic distance in human genetic data. At  
163 higher PCs, however, there is fine-scale structure in the data separating different geographically proximal  
164 groups within the East African individuals, shown in red. We thus focus our deeper examinations into the East  
165 African samples to assess potential drivers of this differentiation (**Supplementary Figure 1**). For a detailed  
166 discussion of genetic variation within each country see the *Supplementary Information*.

167

168 **Figure 2.** Genetic composition of subcontinental African structure in the NeuroGAP-Psychosis samples. A-D:  
169 PCA biplots for PCs 1-8 with an African reference panel of 1000 Genomes Project AFR populations and the  
170 AGVP dataset. A map of collection locations is shown to the left of PCA plots.

171

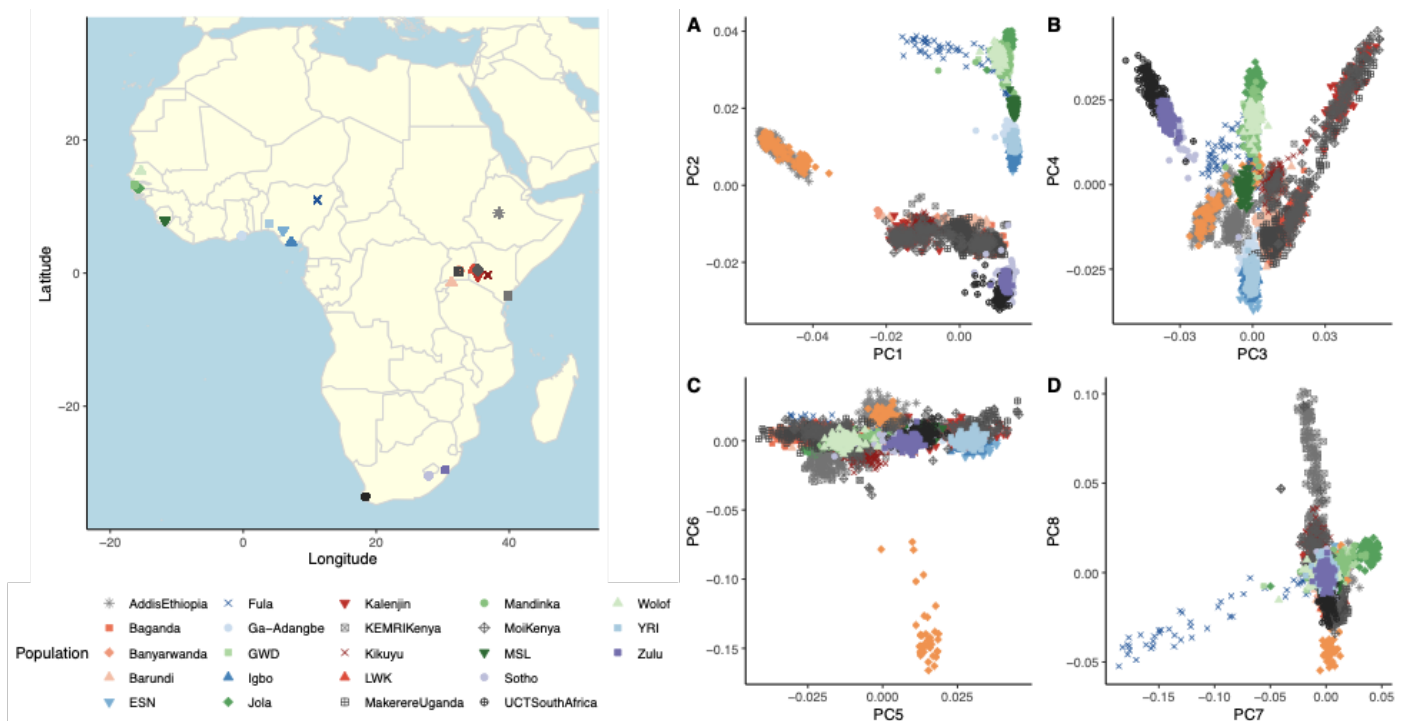



## 175 Self-reported Population Composition

176 Across samples with self-reported ethnolinguistic information, we observe 62 primary ethnicities and 107  
177 primary languages in the 960 NeuroGAP-Psychosis samples, including missing data (Figure 3). We also find  
178 that languages have shifted in frequency over time, with English increasing in reporting frequency in the  
179 current generation, and several grandparental languages disappearing in our dataset (**Figure 3**;  
180 **Supplementary Figures 2-5**).

181 **Figure 3.** Primary self-reported language shifts over three generations. A) Individual languages were re-  
182 classified into broader language families for comparable granularity. B) All languages reported with at least 3%  
183 frequency in any generation are shown across the generations. Note the increase in endorsement of English  
184 and drop in Oromiffa/Oromigna in the present generation.

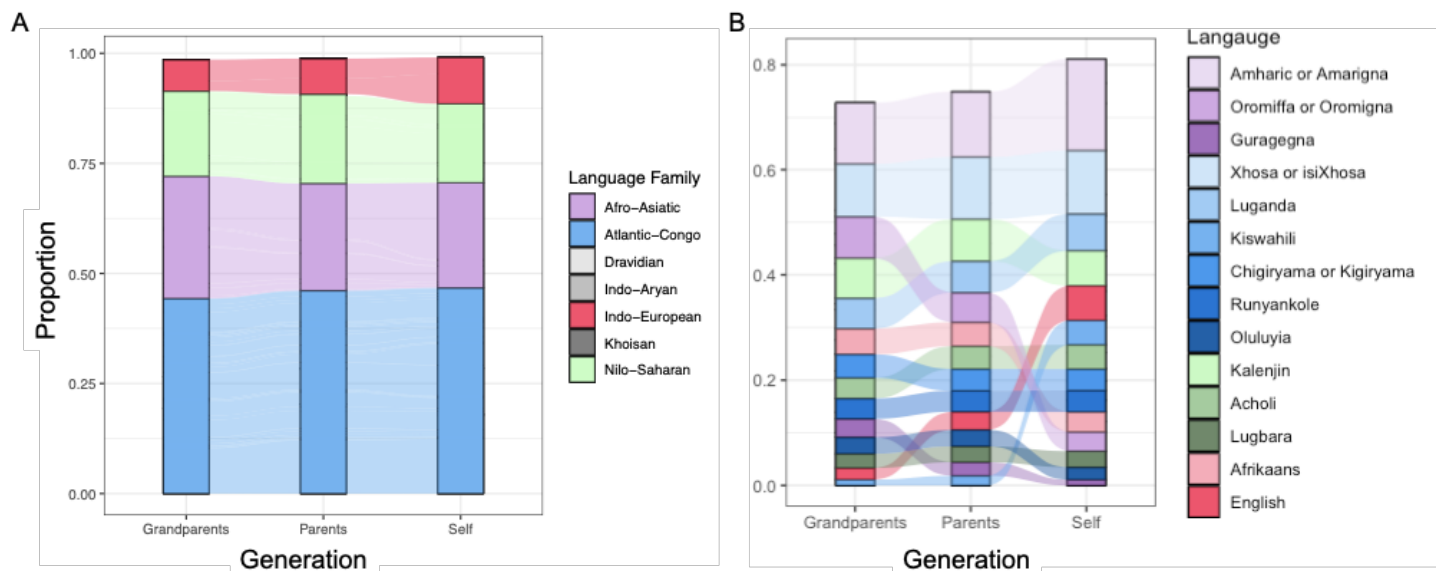

185

186

## 187 Genetic Variation Partitions with Language

188 To assess the correlation between the language that an individual reports to be their primary and the genetic  
189 partitioning that we observed, we conducted Procrustes analyses to measure the correlation between genetic,  
190 linguistic, and geographic variation. Procrustes analysis minimizes the distance between two sets of  
191 coordinates, so we can compare genetic variation reduced to two PCs to the location of each population. Using

192 the phonemes (units of sound) found in the self-reported languages of individuals and their families, along with  
193 the first two PCs of autosomal and X chromosome variation, we found consistent correlations between genetic,  
194 linguistic, and geographic variation throughout Africa (**Table 1**). Because the autosomes and X chromosomes  
195 have considerably different numbers of single nucleotide polymorphisms (SNPs), we additionally compared X  
196 chromosome variation to that from chromosome 22, which is most similar in SNP count to X (variant counts  
197 without/with reference panel: X = 603/1348, chr22 = 705/1455; **Supplementary Figure 6**). To measure  
198 linguistic variation, we queried the PHOIBLE 2.0 phonemic database<sup>23</sup>, which contains phoneme inventories  
199 and phoneme qualities for many languages around the world. The resulting matrices of mean phoneme  
200 presences were used in a PCA to create three sets of linguistic PCs: from personally spoken languages of the  
201 participant, a combined score from those spoken by matrilineal relatives (mother and maternal grandmother),  
202 and a combined score from those of patrilineal relatives (father and paternal grandfather).

203

204 The first two PCs of both autosomal and X chromosome variation correlate more closely to geography  
205 ( $p=0.643$  and  $0.625$  respectively;  $p<5E-5$ ) than the first two PCs of linguistic variation ( $p=0.481$ ;  $p<5E-5$ ).  
206 Genetics are also correlated to linguistic variation to a lesser extent, and autosomal variation is consistently  
207 more strongly correlated to this linguistic variation than is X chromosome variation. When considering  
208 individuals from the entire dataset—Eastern and South Africa—patrilineal languages are more closely  
209 correlated to genetics than are matrilineal languages (by ~15%).

210

211 **Figure 4.** *Procrustes analyses indicate that autosomal genetic diversity is better correlated with geography*  
212 *than is X chromosome diversity. Plots represent the first two genetic PCs after a procrustes-transformation.*  
213 *The upper panels use PCs generated using autosomal variation, and the lower panels use X chromosome*  
214 *variation. The left column uses the locations of the study site at which each individual was sampled; the right*  
215 *column uses each individual's self-reported languages and the centroids of these languages to identify a*  
216 *geographic midpoint of that individual's languages. Individuals are colored by primary field site. For each*  
217 *primary field site, the midpoint of individuals' locations (by study site or languages spoken) is represented by a*  
218 *large point.*

219

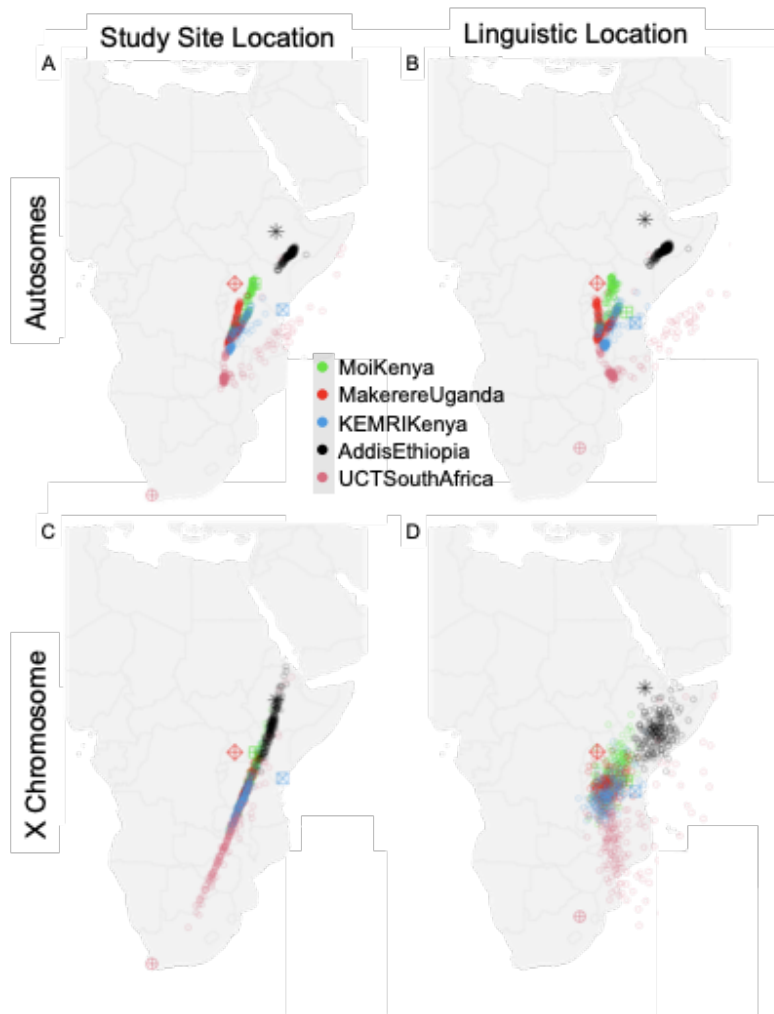

220

221

## 222 *Language Transmission Through Families*

223 As we have detailed multi-generational ethnolinguistic information (see STAR *Methods* “*Ethnolinguistic*  
224 *Phenotypes*”), we computed overall transmission rates of language families over three generations. We initially  
225 examined the raw self-reported information of the participant with respect to the primary, second and third  
226 language spoken. We assessed the frequency with which the primary language reported by the participant  
227 matched each of their older relatives’ (i.e. maternal and paternal grandparents, mother and father) as well as  
228 the frequency with which the participants’ primary reported language matched that of the languages reported  
229 for their relative (**Table 2**). We find that transmission rates are similar between family members of the same  
230 generation when looking at primary language matching any language whether including or excluding English.

231 Partitioning East African individuals by the presence of matri- vs patri-lineal transmission in their traditional  
232 societies (from Murdock's Ethnographic Atlas, code *EA076*<sup>24,25</sup>), we see a significantly higher transmission rate  
233 from individuals assigned to a matrilineal classification ( $p=0.028$ ).

234

### 235 *Testing for Evidence of Sex-biased Demography*

236 To examine if there was evidence for sex-biased gene flow in our samples, we ran more Procrustes analyses  
237 comparing genetic and linguistic variation on the X chromosome as compared to the autosomes. We also  
238 assessed the similarity of ancestry proportions on the X chromosome versus autosomes. Ancestry fractions  
239 were highly correlated across these genomic regions, indicating no evidence for sex-biased demography at  
240 this scale (**Supplementary Figure 7**). Similarly, the Procrustes tests showed significant correlation between  
241 PCs 1 and 2 of X and autosomal variation ( $\rho = 0.880$  for all of Africa and  $\rho = 0.884$  for East Africa alone).  
242 Compared to chr22 instead, results were similar ( $\rho = 0.836$  for all Africa and  $\rho = 0.841$  for East Africa).  
243 Wilcoxon signed rank tests comparing the fractions of ancestry on X versus autosomes from ADMIXTURE at  
244  $k=4$  did not find a significant difference in the means, nor for PC1 vs PC2 ( $p = 0.3754$ ).

245

### 246 *Reference Panels Miss Meaningful Allele Frequency Resolution within Africa*

247 We visualized allele frequencies for functionally important variants across our 5 collection sites as compared to  
248 reference data from the 1000 Genomes Project. One example variant, key in beta-thalassemia, dramatically  
249 varies in frequency depending on the precise location in Africa (**Supplementary Figure 8**). As this variant has  
250 direct consequences on human health, consideration of the difference in frequency across the continent is  
251 useful. For another example, rs72629486, a missense coding single nucleotide variant in the gene *ACTRT2*,  
252 ranges in minor allele frequency (MAF) in NeuroGAP-Psychosis from 5% in Ethiopia down to 1.3% in Uganda.  
253 This is nearly the full range of the frequency distribution for all global populations in the gnomAD database<sup>26</sup>,  
254 which lists the variant in the AFR as 5.5%, missing finer resolution. rs72629486 is predicted to be deleterious  
255 and probably damaging by SIFT and PolyPhen, respectively, and has a combined annotation dependent  
256 depletion score of 22.9, highlighting that this variant is likely to be highly functionally important<sup>27-29</sup>.

257

## 258 **Discussion**

259 Africa is a highly diverse continent, home to immense genetic, linguistic, and cultural diversity. This  
260 ethnolinguistic variation is extremely complex and is meaningful to disentangle prior to statistical genetics  
261 analyses. Here, we measured the correlation between genetic, linguistic, and geographic variation, finding that  
262 genetic and linguistic variation are closely correlated to each other as well as to geography across the African  
263 continent. This is consistent with previous work examining global patterns of diversity as well as the 'Bantu  
264 expansion', one of the largest demographic events in African history<sup>11,12,16,30-32</sup>. However, we find that in East  
265 Africa, language better separates genetic structure in our dataset than does geography (**Figure 1**,  
266 **Supplementary Figure 1**), a phenomenon that has been noted in Europe and Ethiopia previously<sup>20,22,33,34</sup>. This  
267 is notable, as most studies currently operate under the expectation of perfect isolation by distance. We find  
268 here that individuals collected from the same geographic location show significant genetic differentiation by  
269 language family, particularly in East Africa where there is immense linguistic diversity. This finding should  
270 influence how population substructure is controlled for in genetic tests, suggesting that a more nuanced  
271 treatment of genetic clusters with incorporation of ethnolinguistic classifications may sometimes be the most  
272 suitable approach. For example, future work exploring the direct incorporation of ethnolinguistic affiliations into  
273 linear mixed models would be useful, e.g. in the context of a kinship matrix equivalent<sup>35</sup>.

274

275 As there is such immense genetic variation across the African continent<sup>19,36-39</sup>, we highlight cases where such  
276 variability may be particularly informative. Africa is not simply one monolithic location, as it is sometimes  
277 treated in major genomics resources such as gnomAD allele frequency reports and the TOPMed dataset (data  
278 that include primarily or exclusively African Americans)<sup>26,40</sup>. Rather, there is an inordinate amount of genetic  
279 variability within it. These examples highlight both the diversity of variation within the African continent, as well  
280 as the fact that within-Africa variation can be informative for broader variant interpretation; many variants  
281 appearing rare elsewhere are common in parts of Africa.

282

283 As part of the NeuroGAP-Psychosis study's recruitment process, multi-generational self-reported  
284 ethnolinguistic data was collected from participants, including individual ethnicity and at least primary, second  
285 and third language from participants for themselves, as well as for each of their parents and grandparents. This  
286 provides us with an unusually rich depth of multigenerational demographic information from participants, a  
287 unique strength of our dataset that affords us the opportunity to investigate language transmission through the  
288 pedigree and shifts in language frequencies over time. First, we examined the overall change in self-reported  
289 language frequencies over three generations. Perhaps most striking is the increase in the reporting frequency  
290 of English by participants as their primary language as compared to their reports for older generations of their  
291 family. We also find that twelve languages reported for earlier generations were not spoken by the participants,  
292 indicating that they have disappeared from our dataset. Khoekhoe, Somali, and Urdu disappeared in the  
293 parental generation, and Amba, Afar, Argobba, Gumuz, Harar, Hindi, Soddo, Soo, and Tamil were no longer  
294 reported languages in the participants' generation. Interestingly, these languages represent a mix of both  
295 historically spoken and imported languages for the countries that enrolled participants in the NeuroGAP-  
296 Psychosis study. While these results are intriguing, we wish to stress that our participants are not necessarily  
297 representative of the local populations from which they come. A further consideration is a potential upwards  
298 bias towards reporting of English and Amharic as a primary language due to a preference towards reporting  
299 the language of consent as primary (consent form languages options increased over time; for example, in  
300 Ethiopia, initially only English and Amharic were offered), as well as towards languages taught in local  
301 educational systems. This additionally highlights the importance of careful consideration of items on self-report  
302 forms to ensure accurate and representative phenotype collection.

303

304 To take a closer look at language transmission across the pedigree, we calculated frequencies of transmission  
305 between various relatives in our family tree. In these calculations, we ran tests both including as well as  
306 excluding English in the event of such a potential upwards bias, and to get a better sense of transmission of  
307 languages that have been present in the continent for a longer period of time than recently imported  
308 languages. We additionally reclassified groups as being matrilineal or patrilineal using the database  
309 Ethnographic Atlas (EA)<sup>24</sup> and recalculated the transmission rates within those two classifications.

310 Matri/patrilineal implies the pattern of inheritance or the tracing of kinship and whether a child generally  
 311 identifies more with the social system of the mother's or father's line. Interestingly, though our sample size for  
 312 matrilineal groups is quite small (N=105 and 674 for matrilineal and patrilineal respectively), we find that there  
 313 is a significantly higher language transmission rate for individuals assigned to matrilineal groups.

314  
 315 In summary, better understanding the composition of samples is a key first step to calibrating subsequent  
 316 statistical genetics analyses. Cultural factors such as language can dramatically impact the structure of cohort  
 317 data; we find that self-reported language classifications meaningfully tag underlying genetic variation that  
 318 would be missed with consideration of geography alone. The work presented here improves the understanding  
 319 of the immense spectrum of genetic and ethnolinguistic variation found across multiple African populations and  
 320 sheds light on the shifts in language endorsement over the past three generations in five collection sites.

321

## 322 Tables

323 **Table 1.** Procrustes correlations between genetics, geography, and language. All  $p < 5E-5$ . The first two PCs  
 324 of autosomal and X chromosome variation were used for comparisons. Linguistic variation was calculated as a  
 325 function of mean phoneme presence across all languages reported by the individual across their pedigree.

326

| Subset of individuals | PCs 1 & 2:<br>Genetic | Geography | Self  | Languages spoken by  |                      |
|-----------------------|-----------------------|-----------|-------|----------------------|----------------------|
|                       |                       |           |       | Mother & Grandmother | Father & Grandfather |
| All individuals       | Autosomal             | 0.6327    | 0.450 | 0.3167               | 0.3764               |
|                       | X chr.                | 0.6248    | 0.423 | 0.3046               | 0.3713               |
| East Africa           | Autosome              | 0.7734    | 0.627 | 0.5616               | 0.5648               |
|                       | X chr.                | 0.6810    | 0.585 | 0.5423               | 0.5304               |

327

328 **Table 2.** *Language transmission rates from relatives.*

329 Frequency of a participants' reported primary language matching one of the top three reported languages  
330 spoken by relatives. Rates were calculated both with and without excluding English. In East Africa, individuals  
331 were additionally partitioned by their affiliation with either a matrilineal vs patrilineal ethnolinguistic group.

332

| Family Member         | Transmission Rate |               |                            |                            |
|-----------------------|-------------------|---------------|----------------------------|----------------------------|
|                       | All               | Excl. English | Patrilineal<br>(E. Africa) | Matrilineal<br>(E. Africa) |
| Father                | 0.810             | 0.818         | 0.837                      | 0.871                      |
| Mother                | 0.802             | 0.809         | 0.811                      | 0.800                      |
| Paternal grandfathers | 0.778             | 0.775         | 0.726                      | 0.926                      |
| Paternal grandmothers | 0.773             | 0.767         | 0.738                      | 0.939                      |
| Maternal grandfathers | 0.762             | 0.758         | 0.708                      | 0.903                      |
| Maternal grandmothers | 0.758             | 0.753         | 0.726                      | 0.812                      |

333

334

### 335 **STAR Methods**

#### 336 *Collection Strategy*

337 As described in more detail in the published protocol<sup>9</sup>, NeuroGAP-Psychosis is a case-control study recruiting  
338 participants from more than two dozen hospitals and medical clinics in Ethiopia, Kenya, South Africa, and  
339 Uganda. Participants are recruited in languages in which they are fluent, including Acholi, Afrikaans, Amharic,  
340 English, Kiswahili, Luganda, Lugbara, Oromiffa/Oromigna, Runyankole, and isiXhosa. After consenting to be in  
341 the study, participants give a saliva sample using an Oragene kit (OG-500.005) for DNA extraction. Study staff  
342 then ask a range of questions on demographics, mental health, and physical health and take the participants'  
343 blood pressure, heart rate, height, and weight. The whole study visit lasts approximately 60-90 minutes.



344

### 345 *Ethnolinguistic Phenotypes*

346 Multiple phenotypes related to self-reported ethnolinguistic categorizations have been collected as part of the  
347 recruitment process. This includes multi-generational data including each participants' primary, secondary and  
348 tertiary language and ethnicity, and birth country. All linguistic data were collected from participants both for  
349 themselves as well as for each of their parents and grandparents, giving an unusually rich depth of information.

350 The specific phrasing of questions collected are as follows:

351 Primary language: "What primary language do you speak?"

352 2nd language: "What 2nd language do you speak?"

353 3rd language: "What 3rd language do you speak?"

354 Primary ethnicity: "What is your ethnicity or tribe?"

355 2nd ethnicity: "What is your ethnicity or tribe?"

356 3rd ethnicity: "What is your ethnicity or tribe?"

357

358 Reports for other relatives followed similar phrasing. The primary language question for each is listed, with  
359 primary swapped for '2nd' or '3rd' for the second and third reported languages for that family member.

360 Mother: "What was the primary language that your biological mother spoke?"

361 Father: "What was the primary language that your biological father spoke?"

362 Maternal grandmother: "What primary language did your biological mother's mother speak?"

363 Maternal grandfather: "What primary language did your biological mother's father speak?"

364 Paternal grandmother: "What primary language did your biological father's mother speak?"

365 Paternal grandfather: "What primary language did your biological father's father speak?"

366

### 367 *Genetic Data Quality Control*

368 Quality control (QC) procedures for NeuroGAP-Psychosis data were done using the Hail python library

369 ([www.Hail.is](http://www.Hail.is)). All of the data was stored on Google Cloud. The QC steps and filters used were adapted from

370 Ricopili<sup>41</sup> and Anderson et al. 2011<sup>42</sup>. The data was genotyped using the Illumina Global Screening Array. For  
371 each of the five NeuroGAP-Psychosis sites, a vcf with genotyping data was stored on Google Cloud. Before  
372 QC, each data vcf contained 192 samples and 687537 variants. When looking at the data pre-QC we  
373 discovered elevated deviations in Hardy Weinberg Equilibrium. We found that the metric which outlined the  
374 individuals causing these deviations was called autocall call rate, Illumina's custom genotype calling algorithm  
375 (See Supplementary Information). The QC filtering steps took place after removing individuals with an autocall  
376 call rate less than .95. 937 of the original 960 individuals remained. These 960 individuals were used for the  
377 linguistic transmission analyses presented here, while for genetic analyses further QC on variants was  
378 conducted.

379

380 The site vcfs were imported as Hail matrix tables and annotated with appropriated data from the metadata file  
381 before being merged. The resulting matrix table had 937 samples and 687537 variants. Prior to QC, the joint  
382 dataset was split into autosomes, PAR, and nonPAR regions of the X chromosome. QC filtering was  
383 conducted separately for the autosome and X chromosome regions. Pre-QC, the autosomal dataset had 937  
384 samples and 669346 variants. The following is a list of the QC steps and parameters used for autosomal QC.  
385 (1) Removing variants with a call rate less than 95%. After filtering, 638235 variants remained. (2) Removing  
386 individuals with a call rate less than 98%. After filtering, 930 individuals remained. (3) Removing individuals  
387 whose reported sex did not match their genotypic sex. After filtering, 923 individuals remained. (4) Removing  
388 variants with a minor allele frequency less than 0.5%. After filtering, 360,321 variants remained. (5) Removing  
389 variants with a Hardy Weinberg Equilibrium p-value less than  $1 \times 10^{-3}$ . After filtering, 331667 variants  
390 remained. (6) Using PC-Relate with 10 PCs, removing individuals with a kinship coefficient greater than .125.  
391 After filtering, 900 individuals remained. After autosomal QC, 900 individuals and 331667 variants remained.

392

393 The PAR and nonPAR regions of the X chromosome were subset to the 900 samples which passed autosomal  
394 QC before going through variant QC. The same variant thresholds used for autosomal QC were used to  
395 conduct QC on the PAR region. Pre-QC the PAR region dataset had 900 samples and 518 variants. (1) After  
396 SNP call rate filtering, 515 variants remained. (2) After MAF filtering, 411 variants remained. (3) After HWE

397 filtering, 402 variants remain. Post-QC, the PAR region had 900 samples and 402 variants. For the nonPAR  
398 region, the dataset was split by sex. The female nonPAR dataset had 441 samples and 17673 variants. Variant  
399 QC was carried out on the females using the following metrics. (1) Removing variants with a call rate less than  
400 98%. After filtering, 16261 variants remained. (2) Removing variants with a minor allele frequency less than  
401 1%. After filtering, 11113 variants remained. (3) Removing variants with a Hardy Weinberg Equilibrium p-value  
402 less than  $1 \times 10^{-6}$ . After filtering, 11104 variants remained. After nonPAR QC on the females, the male nonPAR  
403 dataset was merged with the female QC'd nonPAR dataset. The final nonPAR dataset had 900 samples and  
404 11104 variants. After filtering, the three datasets were merged into one matrix table. The final merged, post-QC  
405 dataset contained 900 samples and 343173 variants and was written out to vcf and plink format for further  
406 analyses. The counts of variants/individuals per site after autosomal and X QC can be found in

407 **Supplementary Tables 1-2.**

408

409 After QC, the dataset was merged with two different reference panel datasets, the 1000 Genomes Project  
410 (TGP)<sup>43</sup> and the AGVP<sup>38</sup>. Before merging the datasets, AGVP had 1297 samples and 1778578 variants while  
411 TGP had 2504 samples and 17892192 variants. Before these two datasets were merged the variants in the  
412 AGVP dataset were flipped using the plink command --flip. In addition, indels were removed from the TGP  
413 dataset, and variants with more than 3 alleles were removed from the AGVP dataset. After removing triallelic  
414 sites from the AGVP dataset, there were 1297 samples and 1771279 variants. After removing indels from the  
415 TGP dataset, there were 16101868 variants and 2504 samples. After merging the two reference panels, there  
416 were 3801 samples and 16194904 variants. After the two reference datasets were merged, --geno filter from  
417 plink was run with .05 threshold to remove variants which had missing genotype call rates greater than 95%.  
418 After this filter, 1677440 variants and 3801 samples remained. Lastly, related individuals were removed from  
419 the merged AGVP and 1000 Genome dataset. The final dataset had 3784 samples and 1677440 variants.

420

421 The reference dataset was then merged with the postQC NeuroGAP-Psychosis dataset containing both  
422 autosomal and X chromosome data. Before merging with the reference panel the NeuroGAP-Psychosis  
423 dataset had 900 samples and 343173 variants. Variants with more than 3 alleles were removed from the

424 NeuroGAP-Psychosis dataset. After this the dataset had 343166 variants. After merging the NeuroGAP-  
425 Psychosis dataset with the AGVP+TGP reference panel the dataset contained 4684 samples and 1814839  
426 variants. A --geno filter with .05 was run on the merged dataset. After the filter, 4684 samples and 205767  
427 variants remained. Our processing pipeline is freely available at:

428 <https://github.com/atgu/NeuroGAP/tree/master/PilotDataQC>.

429

### 430 *Population Structure and Admixture Analyses*

431 Cohort data from the five NeuroGAP-Psychosis plates were merged with African reference populations from  
432 the 1000 Genomes Project<sup>43</sup> and the African Genome Variation Project<sup>38</sup>. These populations provide  
433 reasonably comprehensive geographic coverage across the African continent from currently available  
434 reference panels and contain populations which are co-located in the same countries as all NeuroGAP-  
435 Psychosis samples. PCA was run using flashPCA<sup>44</sup>. Detailed examination of admixture was conducted using  
436 the program ADMIXTURE<sup>45</sup> with five-fold cross validation error to inform the correct number of clusters. Plots  
437 from ADMIXTURE output were generated with pong<sup>46</sup>. ADMIXTURE was run using a tailored representation of  
438 global genetic data consisting of all continental African populations, the CHB population from China to capture  
439 East Asian admixture, the GBR from Britain to capture European admixture, and the GIH from India to capture  
440 South Asian ancestry. Fst estimates across populations were generated using smartPCA<sup>47</sup>. Fst heatmaps were  
441 generated in R using the package *corrplot*. The relationship between ancestry composition on the autosomes  
442 vs X chromosome was examined using Pearson correlation and mantel tests in R with the package *ade4*.  
443 Frequency plots of variants across the globe were created with the GGV browser<sup>48</sup>.

444

### 445 *Relationship between Genetics and Language*

446 To measure linguistic variation, we made use of the PHOIBLE 2.0 phonemic database<sup>23</sup>, which contains  
447 phoneme inventories and phoneme qualities for languages around the world. For every individual, we identified  
448 all languages spoken—excluding English—which were present in the PHOIBLE database (84.5% of languages  
449 spoken by the individuals themselves, and 81.1% of languages spoken by their relatives). Using the phoneme

450 inventories (including both primary phonemes and their allophones) from PHOIBLE, we found the mean  
451 phoneme presence for each individual's or each relative's spoken languages. The resulting matrices (of  
452 individuals or their relatives, and mean phoneme presences) were used for PCA conducted in R to create three  
453 sets of principal components (PCs): from personally spoken languages, from those spoken by matrilineal  
454 relatives (mother and maternal grandmother), and from those of patrilineal relatives (father and patrilineal  
455 grandfather).

456

457 First, all languages were assigned the highest-level classifications available in Glottolog 4.2.1<sup>49</sup>. These  
458 classifications were modified to minimize the number of high-level classifications while maintaining an element  
459 of geographic origin. Several classifications were consolidated into Nilo-Saharan (made up of Nilotic, Central  
460 Sudanic, Kuliak and Gamuz classifications) and Khoisan (Khoe-Kwadi, Kxa, and Tuu), and Afro-Asiatic was  
461 expanded (with Ta-Ne-Omoti and Dizoid). Indo-European was split to account for the recent history of its  
462 speakers: Afrikaans and Oorlams were placed into a unique category, the languages of Europe into another,  
463 and those of the Indian subcontinent (Hindi and Urdu) into a third. We excluded languages that were  
464 unclassified or identified as speech registers.

465

466 Every individual was associated with a survey location, meaning the geographic coordinates where the sample  
467 was collected, and we used the spoken languages to assign a different, linguistic location. To do this, using all  
468 languages an individual spoke, and these languages' locations from Glottolog, we calculated the mean location  
469 of each individual's languages.

470

471 To compare linguistic, genetic, and geographic variation, we used a set of Procrustes analyses implemented in  
472 R<sup>50</sup>. For linguistic and genetic variation, the first two PCs of variation were used. Since Procrustes minimizes  
473 the sum of squared euclidean distances, the geographic coordinates of each individual were converted to  
474 points on a sphere. To measure the correlation between geographic variation and linguistic or genetic  
475 variation, the latter were transformed (via rotation and scaling) to minimize the sum of squared distance

476 between individuals' locations and the transformed genetic or linguistic PCs. The first two PCs of procrustes-  
477 transformed linguistic and genetic variation—representing their similarity to geographic variation—were then  
478 plotted onto a map.

479

#### 480 *Anthropological variables*

481 To identify relevant anthropological data, we accessed data from the Ethnographic Atlas (EA)<sup>24</sup> using D-  
482 Place<sup>25</sup>. We associated each ethnicity reported in the NeuroGAP-Psychosis survey data to a society in the EA  
483 (if possible), and used two available variables (*EA012: Marital residence with kin*, and *EA076: Inheritance rule*  
484 *for movable property*). For ethnicities with data, individuals whose ethnicities were associated with consistent  
485 inheritance rules or marital residence patterns were assigned that rule or pattern. Of the 907 NeuroGAP-  
486 Psychosis individuals, 751 were assigned a marital residence pattern (patrilocal, neolocal, or virilocal-like) and  
487 779 were assigned an inheritance rule (matrilineal or patrilineal).

488

489

## 490 **References**

- 491 1. Consortium T 1000 GP, The 1000 Genomes Project Consortium. An integrated map of genetic variation  
492 from 1,092 human genomes [Internet]. Vol. 491, Nature. 2012. p. 56–65. Available from:  
493 <http://dx.doi.org/10.1038/nature11632>
- 494 2. Fearon JD. Ethnic and Cultural Diversity by Country\*. J Econ Growth. 2003 Jun 1;8(2):195–222.
- 495 3. Sirugo G, Williams SM, Tishkoff SA. The Missing Diversity in Human Genetic Studies. Cell. 2019 May  
496 2;177(4):1080.
- 497 4. Popejoy AB, Fullerton SM. Genomics is failing on diversity. Nature. 2016 Oct 13;538(7624):161–4.
- 498 5. Martin AR, Teferra S, Möller M, Hoal EG, Daly MJ. The critical needs and challenges for genetic  
499 architecture studies in Africa. Curr Opin Genet Dev. 2018 Dec;53:113–20.
- 500 6. Morales J, Welter D, Bowler EH, Cerezo M, Harris LW, McMahon AC, et al. A standardized framework for  
501 representation of ancestry data in genomics studies, with application to the NHGRI-EBI GWAS Catalog.  
502 Genome Biol. 2018 Feb 15;19(1):21.
- 503 7. Tishkoff SA, Verrelli BC. Patterns of human genetic diversity: implications for human evolutionary history  
504 and disease. Annu Rev Genomics Hum Genet. 2003;4:293–340.
- 505 8. Martin AR, Kanai M, Kamatani Y, Okada Y, Neale BM, Daly MJ. Clinical use of current polygenic risk  
506 scores may exacerbate health disparities. Nat Genet. 2019 Apr;51(4):584–91.
- 507 9. Stevenson A, Akena D, Stroud RE, Atwoli L, Campbell MM, Chibnik LB, et al. Neuropsychiatric Genetics  
508 of African Populations-Psychosis (NeuroGAP-Psychosis): a case-control study protocol and GWAS in  
509 Ethiopia, Kenya, South Africa and Uganda. BMJ Open. 2019 Feb 19;9(2):e025469.
- 510 10. van der Merwe C, Mwesiga EK, McGregor NW, Ejigu A, Tilahun AW, Kalungi A, et al. Advancing  
511 neuropsychiatric genetics training and collaboration in Africa. The Lancet Global Health. 2018 Mar  
512 1;6(3):e246–7.

- 513 11. Baker JL, Rotimi CN, Shriner D. Human ancestry correlates with language and reveals that race is not an  
514 objective genomic classifier. *Sci Rep*. 2017 May 8;7(1):1572.
- 515 12. Uren C, Kim M, Martin AR, Bobo D, Gignoux CR, van Helden PD, et al. Fine-Scale Human Population  
516 Structure in Southern Africa Reflects Ecogeographic Boundaries. *Genetics*. 2016 Sep;204(1):303–14.
- 517 13. Henn BM, Botigué LR, Gravel S, Wang W, Brisbin A, Byrnes JK, et al. Genomic ancestry of North Africans  
518 supports back-to-Africa migrations. *PLoS Genet*. 2012 Jan;8(1):e1002397.
- 519 14. Henn BM, Botigué LR, Peischl S, Dupanloup I, Lipatov M, Maples BK, et al. Distance from sub-Saharan  
520 Africa predicts mutational load in diverse human genomes. *Proc Natl Acad Sci U S A*. 2016 Jan  
521 26;113(4):E440–9.
- 522 15. Sikora M, Laayouni H, Calafell F, Comas D, Bertranpetit J. A genomic analysis identifies a novel  
523 component in the genetic structure of sub-Saharan African populations. *Eur J Hum Genet*. 2011  
524 Jan;19(1):84–8.
- 525 16. Creanza N, Ruhlen M, Pemberton TJ, Rosenberg NA, Feldman MW, Ramachandran S. A comparison of  
526 worldwide phonemic and genetic variation in human populations. *Proc Natl Acad Sci U S A*. 2015 Feb  
527 3;112(5):1265–72.
- 528 17. Pickrell JK, Patterson N, Loh P-R, Lipson M, Berger B, Stoneking M, et al. Ancient west Eurasian ancestry  
529 in southern and eastern Africa [Internet]. Vol. 111, *Proceedings of the National Academy of Sciences*.  
530 2014. p. 2632–7. Available from: <http://dx.doi.org/10.1073/pnas.1313787111>
- 531 18. Chimusa ER, Meintjies A, Tchanga M, Mulder N, Seoighe C, Soodyall H, et al. A genomic portrait of  
532 haplotype diversity and signatures of selection in indigenous southern African populations. *PLoS Genet*.  
533 2015 Mar;11(3):e1005052.
- 534 19. Bergström A, McCarthy SA, Hui R, Almarri MA, Ayub Q, Danecek P, et al. Insights into human genetic  
535 variation and population history from 929 diverse genomes. *Science* [Internet]. 2020 Mar 20 [cited 2020  
536 Mar 19];367(6484). Available from: <https://science.sciencemag.org/content/367/6484/eaay5012/tab-pdf>



- 537 20. López S, Tarekegn A, Band G, van Dorp L, Bird N. The genetic landscape of Ethiopia: diversity,  
538 intermixing and the association with culture. *bioRxiv* [Internet]. 2021; Available from:  
539 <https://www.biorxiv.org/content/10.1101/756536v2.abstract>
- 540 21. Pagani L, Schiffels S, Gurdasani D, Danecek P, Scally A, Chen Y, et al. Tracing the route of modern  
541 humans out of Africa by using 225 human genome sequences from Ethiopians and Egyptians. *Am J Hum*  
542 *Genet.* 2015 Jun 4;96(6):986–91.
- 543 22. Pagani L, Kivisild T, Tarekegn A, Ekong R, Plaster C, Gallego Romero I, et al. Ethiopian genetic diversity  
544 reveals linguistic stratification and complex influences on the Ethiopian gene pool. *Am J Hum Genet.* 2012  
545 Jul 13;91(1):83–96.
- 546 23. Moran S, McCloy D. PHOIBLE 2.0. Jena: Max Planck Institute for the Science of Human History. 2019;
- 547 24. Murdock GP, Textor R, Barry H III, White DR, Gray JP, Divale W. 2000. *Ethnographic atlas*. *World*  
548 *Cultures.* 1999;10(1):24–136.
- 549 25. Kirby KR, Gray RD, Greenhill SJ, Jordan FM, Gomes-Ng S, Bibiko H-J, et al. D-PLACE: A Global  
550 Database of Cultural, Linguistic and Environmental Diversity. *PLoS One.* 2016 Jul 8;11(7):e0158391.
- 551 26. Karczewski KJ, Francioli LC, Tiao G, Cummings BB, Alföldi J, Wang Q, et al. The mutational constraint  
552 spectrum quantified from variation in 141,456 humans. *Nature.* 2020 May;581(7809):434–43.
- 553 27. Ng PC, Henikoff S. SIFT: Predicting amino acid changes that affect protein function. *Nucleic Acids Res.*  
554 2003 Jul 1;31(13):3812–4.
- 555 28. Adzhubei I, Jordan DM, Sunyaev SR. Predicting functional effect of human missense mutations using  
556 PolyPhen-2. *Curr Protoc Hum Genet.* 2013 Jan;Chapter 7:Unit7.20.
- 557 29. Rentzsch P, Witten D, Cooper GM, Shendure J, Kircher M. CADD: predicting the deleteriousness of  
558 variants throughout the human genome. *Nucleic Acids Res.* 2019 Jan 8;47(D1):D886–94.
- 559 30. de Filippo C, Bostoen K, Stoneking M, Pakendorf B. Bringing together linguistic and genetic evidence to

- 560 test the Bantu expansion. *Proc Biol Sci*. 2012 Aug 22;279(1741):3256–63.
- 561 31. Beleza S, Gusmão L, Amorim A, Carracedo A, Salas A. The genetic legacy of western Bantu migrations.  
562 *Hum Genet*. 2005 Aug;117(4):366–75.
- 563 32. Li S, Schlebusch C, Jakobsson M. Genetic variation reveals large-scale population expansion and  
564 migration during the expansion of Bantu-speaking peoples. *Proc Biol Sci [Internet]*. 2014 Oct  
565 22;281(1793). Available from: <http://dx.doi.org/10.1098/rspb.2014.1448>
- 566 33. Longobardi G, Ghirotto S, Guardiano C, Tassi F, Benazzo A, Ceolin A, et al. Across language families:  
567 Genome diversity mirrors linguistic variation within Europe: Genome Diversity Across Language Families.  
568 *Am J Phys Anthropol*. 2015 Aug;157(4):630–40.
- 569 34. Piazza A, Rendine S, Minch E, Menozzi P, Mountain J, Cavalli-Sforza LL. Genetics and the origin of  
570 European languages. *Proc Natl Acad Sci U S A*. 1995 Jun 20;92(13):5836–40.
- 571 35. Heckerman D, Gurdasani D, Kadie C, Pomilla C, Carstensen T, Martin H, et al. Linear mixed model for  
572 heritability estimation that explicitly addresses environmental variation. *Proc Natl Acad Sci U S A*. 2016 Jul  
573 5;113(27):7377–82.
- 574 36. 1000 Genomes Project Consortium, Abecasis GR, Altshuler D, Auton A, Brooks LD, Durbin RM, et al. A  
575 map of human genome variation from population-scale sequencing. *Nature*. 2010 Oct 28;467(7319):1061–  
576 73.
- 577 37. Choudhury A, Aron S, Botigué LR, Sengupta D, Botha G, Bensellak T, et al. High-depth African genomes  
578 inform human migration and health. *Nature*. 2020 Oct;586(7831):741–8.
- 579 38. Gurdasani D, Carstensen T, Tekola-Ayele F, Pagani L, Tachmazidou I, Hatzikotoulas K, et al. The African  
580 Genome Variation Project shapes medical genetics in Africa. *Nature*. 2015 Jan 15;517(7534):327–32.
- 581 39. Gurdasani D, Carstensen T, Fatumo S, Chen G, Franklin CS, Prado-Martinez J, et al. Uganda Genome  
582 Resource Enables Insights into Population History and Genomic Discovery in Africa. *Cell*. 2019 Oct

- 583 31;179(4):984–1002.e36.
- 584 40. Taliun D, Harris DN, Kessler MD, Carlson J, Szpiech ZA, Torres R, et al. Sequencing of 53,831 diverse  
585 genomes from the NHLBI TOPMed Program. *Nature*. 2021 Feb 10;590(7845):290–9.
- 586 41. Lam M, Awasthi S, Watson HJ, Goldstein J, Panagiotaropoulou G, Trubetsky V, et al. RICOPILI: Rapid  
587 Imputation for CONsortias PIPELine. *Bioinformatics* [Internet]. 2019 Aug 8; Available from:  
588 <http://dx.doi.org/10.1093/bioinformatics/btz633>
- 589 42. Anderson CA, Pettersson FH, Clarke GM, Cardon LR, Morris AP, Zondervan KT. Data quality control in  
590 genetic case-control association studies. *Nat Protoc*. 2010 Sep;5(9):1564–73.
- 591 43. Auton A, Salcedo T. The 1000 Genomes Project [Internet]. Assessing Rare Variation in Complex Traits.  
592 2015. p. 71–85. Available from: [http://dx.doi.org/10.1007/978-1-4939-2824-8\\_6](http://dx.doi.org/10.1007/978-1-4939-2824-8_6)
- 593 44. Abraham G, Qiu Y, Inouye M. FlashPCA2: principal component analysis of Biobank-scale genotype  
594 datasets. *Bioinformatics*. 2017 Sep 1;33(17):2776–8.
- 595 45. Alexander DH, Novembre J, Lange K. Fast model-based estimation of ancestry in unrelated individuals.  
596 *Genome Res*. 2009 Sep;19(9):1655–64.
- 597 46. Behr AA, Liu KZ, Liu-Fang G, Nakka P, Ramachandran S. pong: fast analysis and visualization of latent  
598 clusters in population genetic data. *Bioinformatics*. 2016 Sep 15;32(18):2817–23.
- 599 47. Patterson N, Price AL, Reich D. Population structure and eigenanalysis. *PLoS Genet*. 2006  
600 Dec;2(12):e190.
- 601 48. Marcus JH, Novembre J. Visualizing the geography of genetic variants. *Bioinformatics*. 2017 Feb  
602 15;33(4):594–5.
- 603 49. Hammarström H, Forkel R, Haspelmath M, Bank S. glottolog/glottolog: Glottolog database 4.2.1 [Internet].  
604 2020. Available from: <https://zenodo.org/record/3754591>
- 605 50. Dixon P. VEGAN, a package of R functions for community ecology. *J Veg Sci*. 2003 Dec 9;14(6):927–30.

606

## 607 **Acknowledgements**

608 We thank all participants for their willingness to contribute their data to this effort. John Mugane and Ana Maria  
609 Olivares provided advice and assistance related to this project. This work was supported by funding from the  
610 NIH/National Institute of Mental Health (K01MH121659 and T32MH017119 to E.G.A.; K99/R00MH117229 to  
611 A.R.M.; L.B.C., K.C.K, B.G., D.J.S, S.T., and D.A. are supported in part by R01MH120642).

612

## 613 **Author Contributions**

614 Conceptualization, E.G.A.; A.R.M.; K.C.K.; Formal Analysis, E.G.A., S.D., Y.P., A.K., L.M.; Data Curation, M.B.,  
615 Z.K., C.P.N., A.S., R.E.S; Investigation: S.G., J.K., R.J., R.M.M., M.A., W.E.I., G.K., W.S., F.K.A., H.M., L.M.;  
616 Resources, T.A., D.A., M.A., F.K.A., L.A., A.F., S.G., W.E.I., R.J., S.M.K., G.K., E.K., J.K., H.M., R.M.M.,  
617 C.R.J.N., R.R., W.S., D.J.S., S.T., Z.Z.; Writing - Original Draft, E.G.A., A.R.M.; Writing - Review & Editing, all  
618 authors; Visualization, E.G.A., S.D., Y.P., A.K., L.M., Z.K.; Supervision, N.C., M.J.D, B.M.N., K.C.K., S.R., A.S.,  
619 T.A., D.A., L.A., A.F., W.E.I., S.M.K., G.K., E.K., C.P.N., C.R.J.N., R.R., D.J.S., R.E.S., S.T., Z.Z., L.B.C., B.G.;  
620 Project Administration, A.S., R.E.S., M.A., S.G., R.J., J.K., L.O., R.M.M., C.P.N.; Funding Acquisition, M.J.D,  
621 B.M.N., K.C.K.

622

## 623 **Human Subjects Approval**

624 Ethical clearances to conduct this study have been obtained from all participating sites, including:  
625 · Ethiopia: Addis Ababa University College of Health Sciences (#014/17/Psy) and the Ministry of Science and  
626 Technology National Research Ethics Review Committee (#3.10/14/2018).  
627 · Kenya: Moi University School of Medicine Institutional Research and Ethics Committee (#IREC/2016/145,  
628 approval number: IREC 1727), Kenya National Council of Science and Technology  
629 (#NACOSTI/P/17/56302/19576), KEMRI Centre Scientific Committee (CSC# KEMRI/CGMRC/CSC/070/2016),  
630 KEMRI Scientific and Ethics Review Unit (SERU# KEMRI/SERU/CGMR-C/070/3575)

631 · South Africa: The University of Cape Town Human Research Ethics Committee (#466/2016)

632 · Uganda: The Makerere University School of Medicine Research and Ethics Committee (SOMREC #REC

633 REF 2016-057) and the Uganda National Council for Science and Technology (UNCST #HS14ES)

634 · USA: The Harvard T.H. Chan School of Public Health (#IRB17-0822)

635

### 636 **Data and Code Availability Statement**

637 The genetic data generated during this study for NeuroGAP-Psychosis samples will be made available on

638 dbGAP (in process). Code used to process and analyze data is freely available here:

639 <https://github.com/atgu/NeuroGAP>.

640

### 641 **Declaration of Interests**

642 A.R.M. has consulted for 23andMe and Illumina and received speaker fees from Genentech, Pfizer, and

643 Illumina. B.M.N. is a member of the Deep Genomics Scientific Advisory Board. He also serves as a consultant

644 for the Camp4 Therapeutics Corporation, Takeda Pharmaceutical and Biogen. M.J.D. is a founder of Maze

645 Therapeutics. The remaining authors declare no competing interests.

646

647
